# Supplementary material for: Chloroplast phylogenomics and divergence times of Lagerstroemia (Lythraceae)
Source: PubMed Central journal article supplement (PMC8191006; doi:10.1186/s12864-021-07769-x), 2021-06-09
Supplement: 12864_2021_7769_MOESM3_ESM.pdf [file 12864_2021_7769_MOESM3_ESM.pdf]

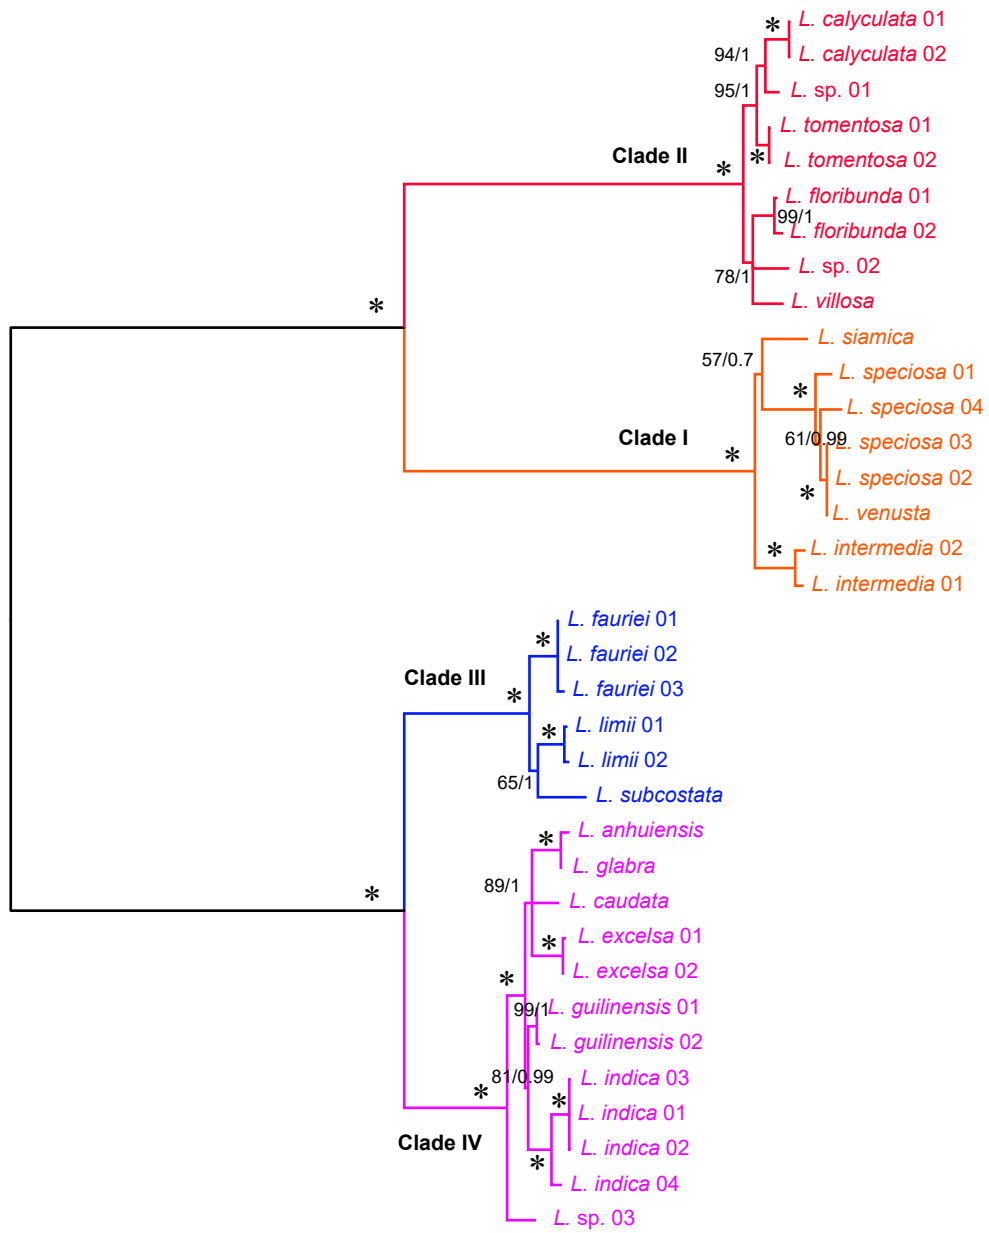

9.0E-4
